# Supplementary material
Source: HighWire-hosted journal article supplement (https://jitc.bmj.com/content/10/2/e003572)
Supplement: inline-supplementary-material-2 [file inline-supplementary-material-2.pdf]

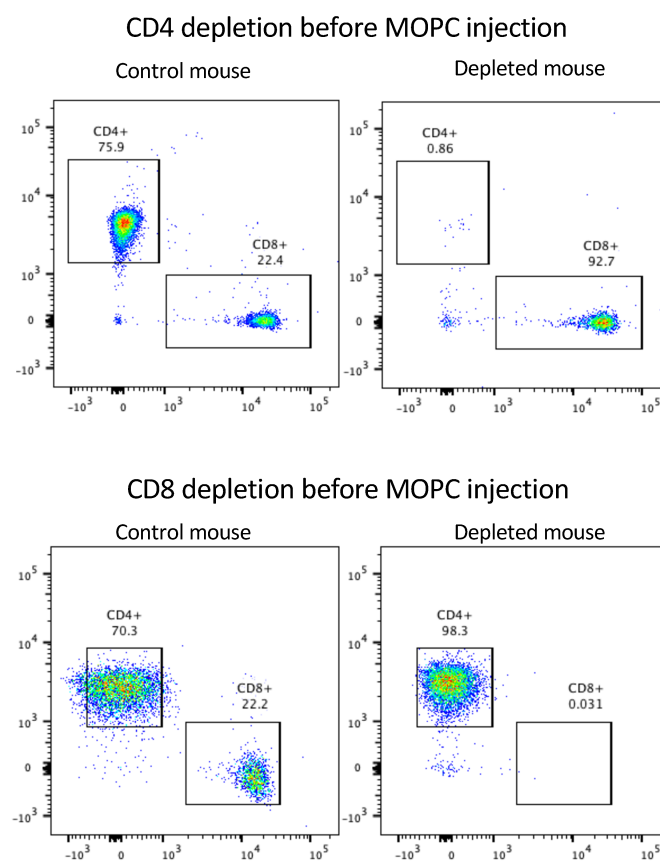

Sup. Figure 1: CD4 and CD8 T cells were depleted 3 consecutive days before tumor challenge with anti-CD4 and anti CD8b respectively (depleted mice) and control mice received the same dose of isotype controls. Depletion was verified by flow cytometry staining of PBMC on the day of injection using anti-CD4 (RM4-5) and anti-CD8a (53-6.7) (Biolegend).
